# Supplementary material for: Ultrafast injection-locked amplification in a thin-film distributed feedback microcavity
Source: Royal Society of Chemistry journal article supplement (doi:10.1039/c6nr09973d), 2017-01-01
Supplement: c6nr09973d1.pdf [file c6nr09973d1.pdf]

## Ultrafast injection-locked amplification in a thin-film distributed feedback microcavity

Meng Wang and Xinping Zhang\*

*Institute of Information Photonics Technology and College of Applied Sciences,  
Beijing University of Technology, Beijing 100124, P. R. China*

\*Email: [zhangxinping@bjut.edu.cn](mailto:zhangxinping@bjut.edu.cn)

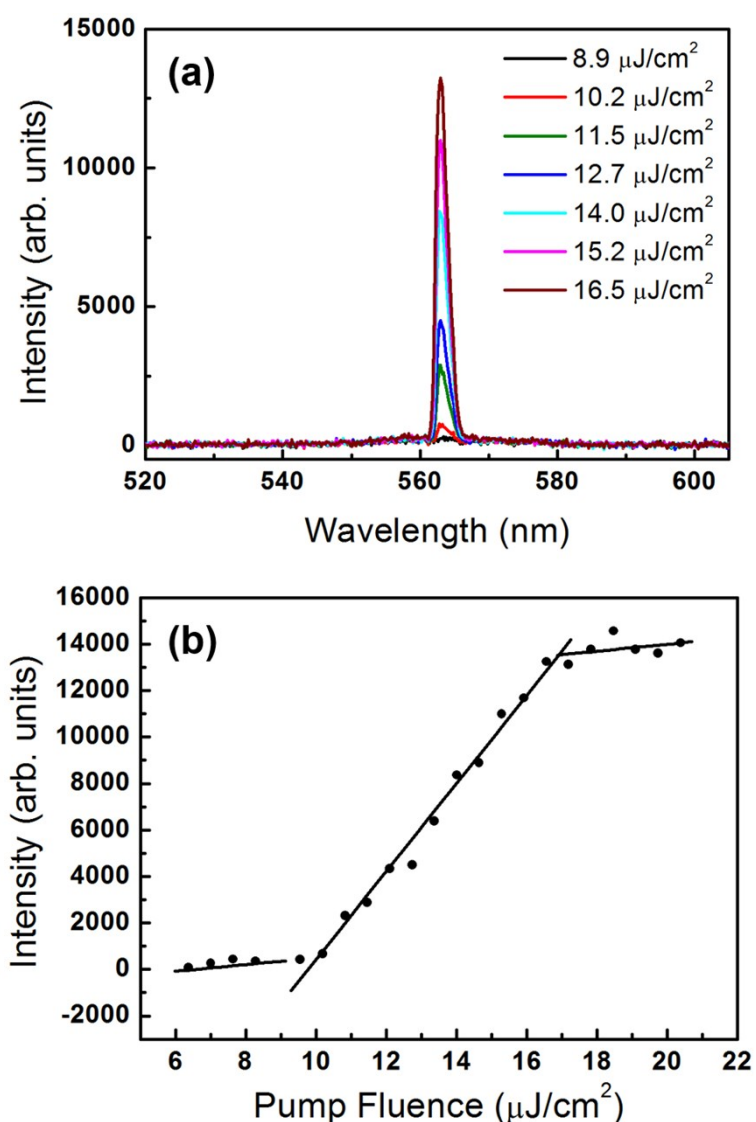

Fig. S1 (a) The intrinsic lasing spectra of the DFB microcavity at different pump fluences. (b) Measurements on the lasing threshold and linear range of the dependence of lasing intensity on the pump fluence.
